# Supplementary material for: Genetic Findings of Sanger and Nanopore Single-Molecule Sequencing in Patients with X-Linked Hearing Loss and Incomplete Partition Type III
Source: Research Square preprint supplement (doi:10.21203/rs.3.rs-501574/v1), 2021-05-13
Supplement: Supplementary file 1 [file 52f86f4377ef4c3707b9211f.docx]

**S1 Table: Pathogenicity prediction of three missense variants using three computational tools**

| Variants | Mutation taster | | PROVEAN | | SIFT | |
| --- | --- | --- | --- | --- | --- | --- |
| Score | Prediction | Score | Prediction | Score | Prediction |
| p.Val215Gly | 4.57 | Disease causing | -7.00 | Deleterious | 0.000 | Damaging |
| p.Arg282Gln | 5.23 | Disease causing | -4.00 | Deleterious | 0.000 | Damaging |
| p.Val321Gly | 4.593 | Disease causing | -6.95 | Deleterious | 0.000 | Damaging |
